# Supplementary material for: Liquid phase exfoliation of bismuth nanosheets for flexible all-solid-state supercapacitors with high energy density
Source: Royal Society of Chemistry journal article supplement (doi:10.1039/d0tc03134h), 2020-01-01
Supplement: d0tc03134h1.pdf [file d0tc03134h1.pdf]

## Supporting information

### Liquid phase exfoliation of bismuth nanosheets for flexible all-solid-state supercapacitors with high energy density

Bingchao Yang,<sup>a</sup> Xiangjun Li,<sup>a</sup> Yong Cheng,<sup>b</sup> Shuai Duan,<sup>a</sup> Bo Zhao,<sup>a</sup> Wencai Yi,<sup>a</sup>  
Chao Wang,<sup>a</sup> Hairui Sun,<sup>a</sup> Zhixiu Wang,<sup>c</sup> Dapeng Gu,<sup>d</sup> Suwen Chen<sup>e</sup> and Xiaobing  
Liu<sup>\*,a</sup>

<sup>a</sup> *Laboratory of High Pressure Physics and Material Science, School of Physics and Physical Engineering, Qufu Normal University, Qufu 273165, China*

<sup>b</sup> *Department of Materials Science and Engineering, College of Materials, Xiamen University, Xiamen 361005, China*

<sup>c</sup> *Administrative Office of Laboratory and Equipment, Qufu Normal University, Qufu 273165, China*

<sup>d</sup> *School of Mechanical Engineering, Yanshan University, Qinhuangdao 066004, China*

<sup>e</sup> *Department of Environmental and Chemical Engineering, Yanshan University, Qinhuangdao 066004, China.*

\*Email: [xiaobing.phy@qfnu.edu.cn](mailto:xiaobing.phy@qfnu.edu.cn)

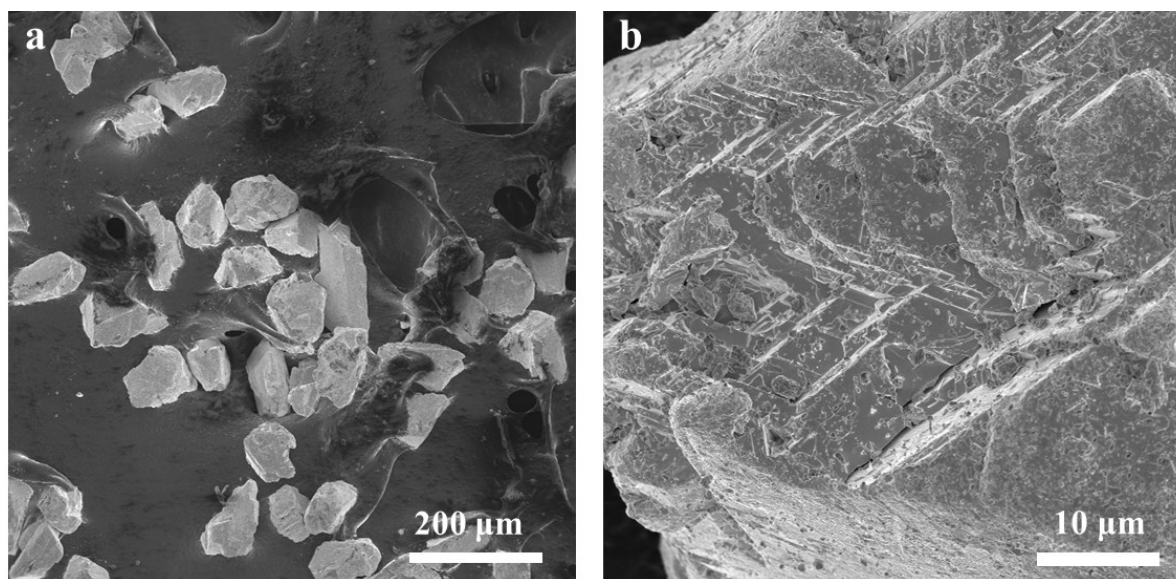

**Figure S1.** (a, b) Different magnification SEM images of original Bi powders.

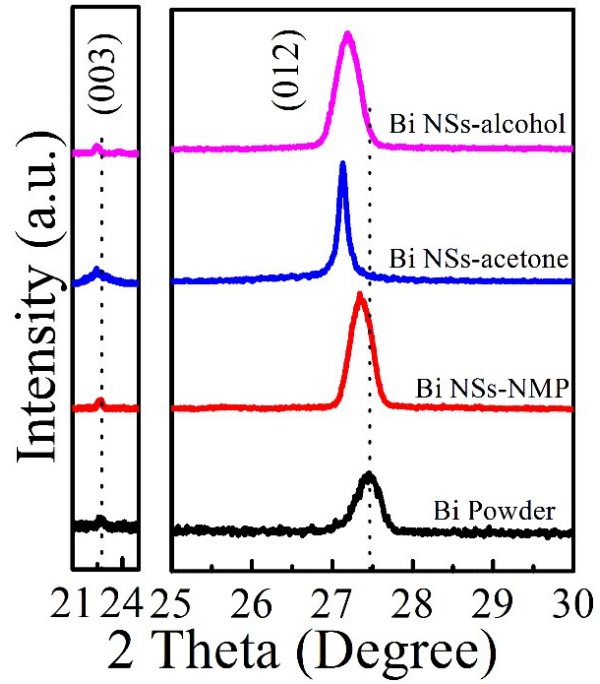

**Figure S2.** Partial XRD pattern of Bi NSs-alcohol, Bi NSs-acetone, Bi NSs-NMP and Bi powder, (a) (003) peak and (b) (012) peak.

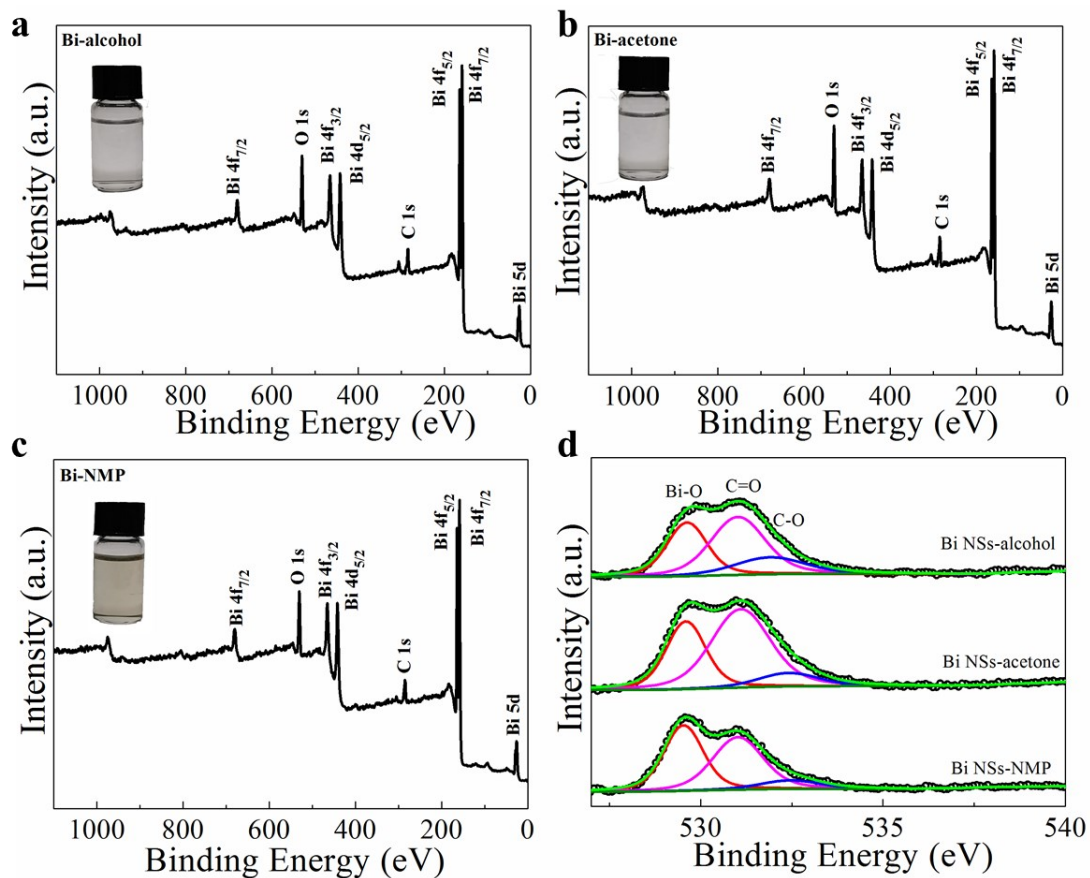

**Figure S3.** (a-c) XPS survey spectrum and (d) high-resolution O1s spectrum of Bi NSs-alcohol, Bi NSs-acetone and Bi NSs-NMP. Insets: The optical images of 2D Bi nanosheets in alcohol, acetone and NMP solutions.

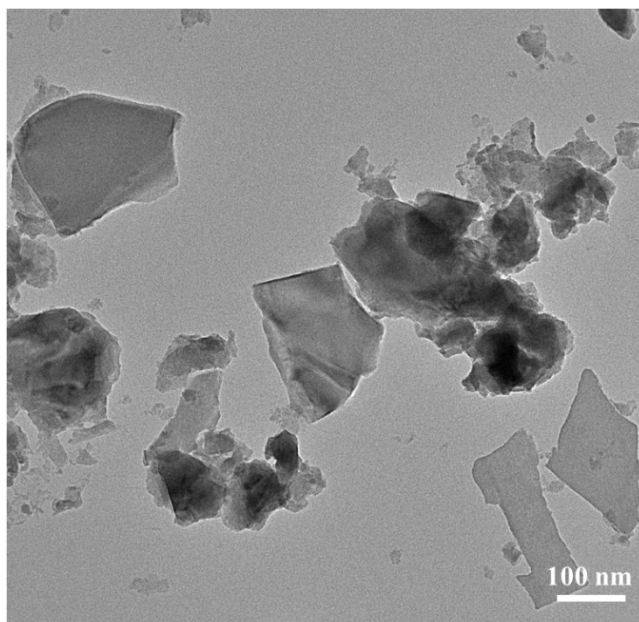

**Figure S4.** Typical low-magnification TEM image of produced 2D Bi NSs.

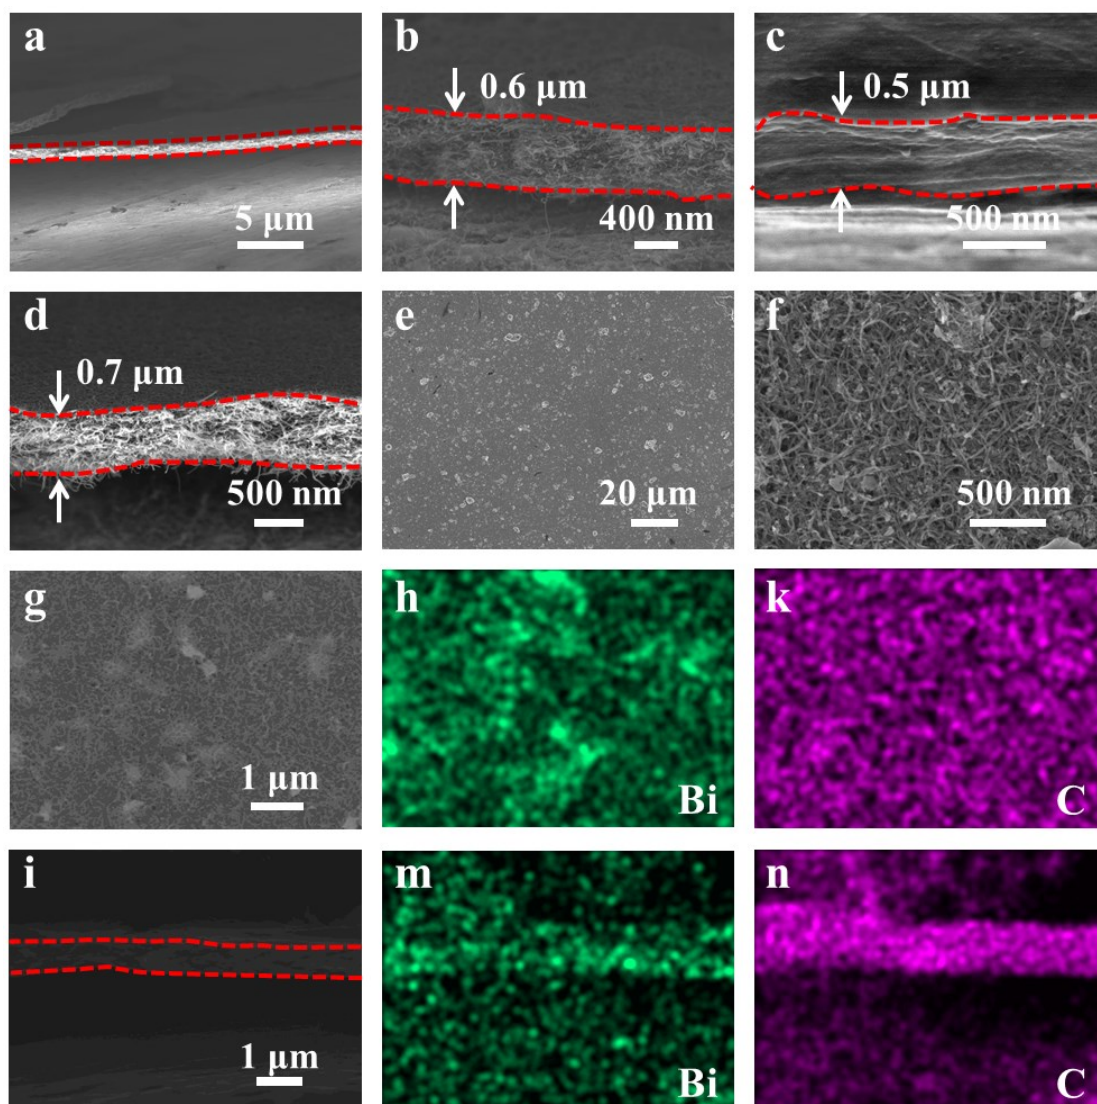

**Figure S5.** Morphological characterization of Bi/CNTs, Bi and CNTs films. (a) Cross-sectional SEM image of the continuous and uniform Bi/CNTs film. (b-c) Cross-section SEM images for Bi/CNTs, Bi and CNTs films with  $\sim 0.6$ ,  $0.5$  and  $0.7$   $\mu\text{m}$  in thickness. (e,f) The top view SEM images with different magnification of Bi/CNTs film. (g-k) The SEM image and energy dispersive spectral (EDS) mapping images of Bi-CNTs film. (i-n) Cross-section SEM image of Bi/CNTs film and the corresponding EDS mapping of Bi and C elements.

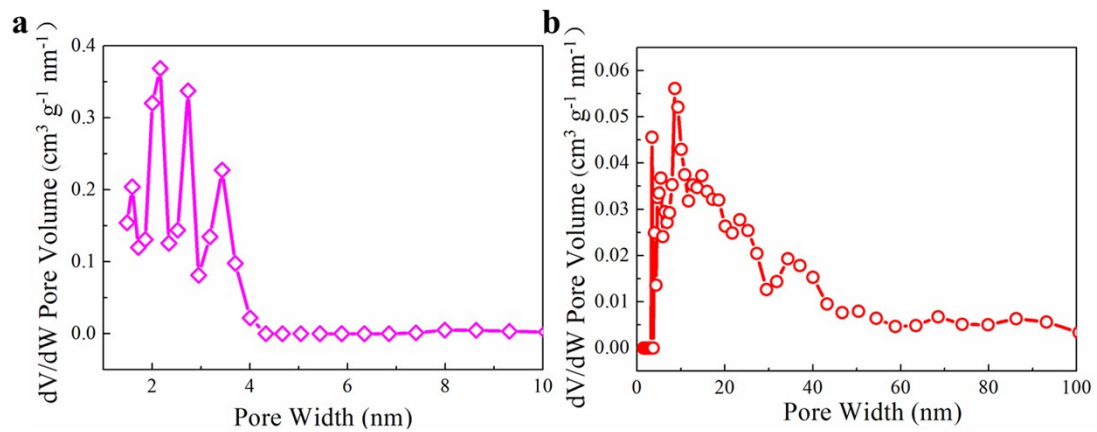

**Figure S6.** The plot of the pore size distribution of the (a) Bi and (b) Bi/CNTs samples.

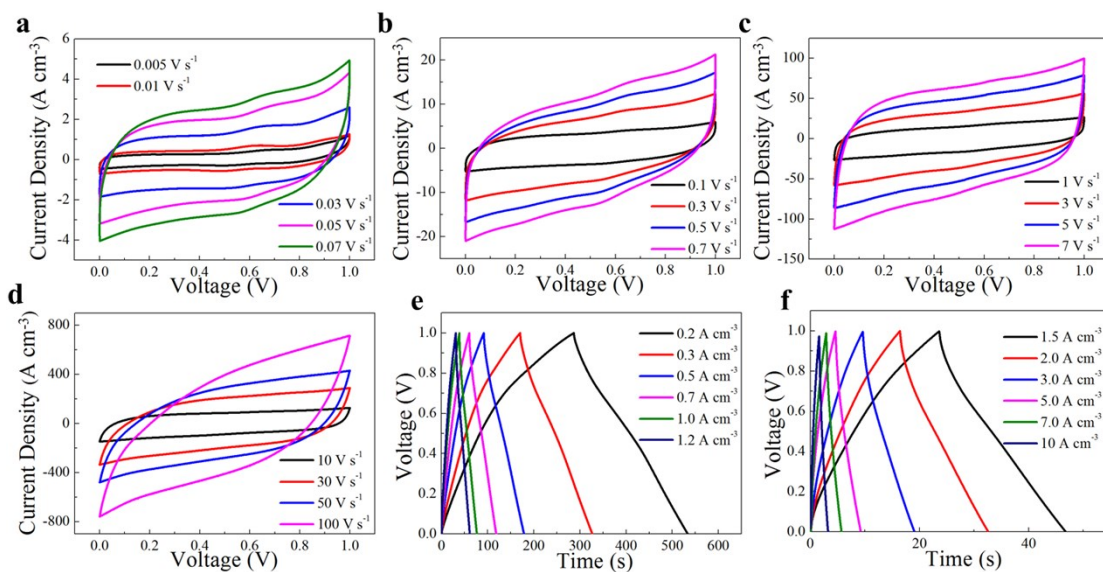

**Figure S7.** Electrochemical properties of Bi/CNTs ASSP device. (a-d) Cyclic voltammograms at various scan rates from 5 mV s<sup>-1</sup> to 100 V s<sup>-1</sup>. (e, f) Galvanostatic charging/discharging curves obtained at different current densities from 0.2 to 10 A cm<sup>-3</sup>.



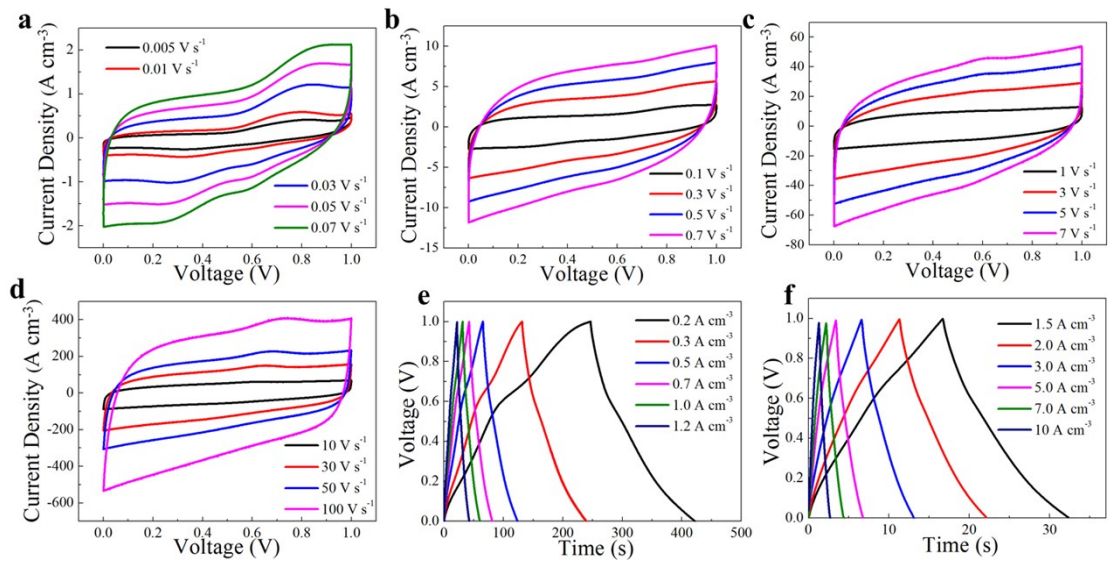

**Figure S8.** Electrochemical properties of 2D Bi NSs ASSP device. (a-d) Cyclic voltammograms at various scan rates from 5 mV s<sup>-1</sup> to 100 V s<sup>-1</sup>. (e, f) Galvanostatic charging/discharging curves obtained at different current densities from 0.2 to 10 A cm<sup>-3</sup>.

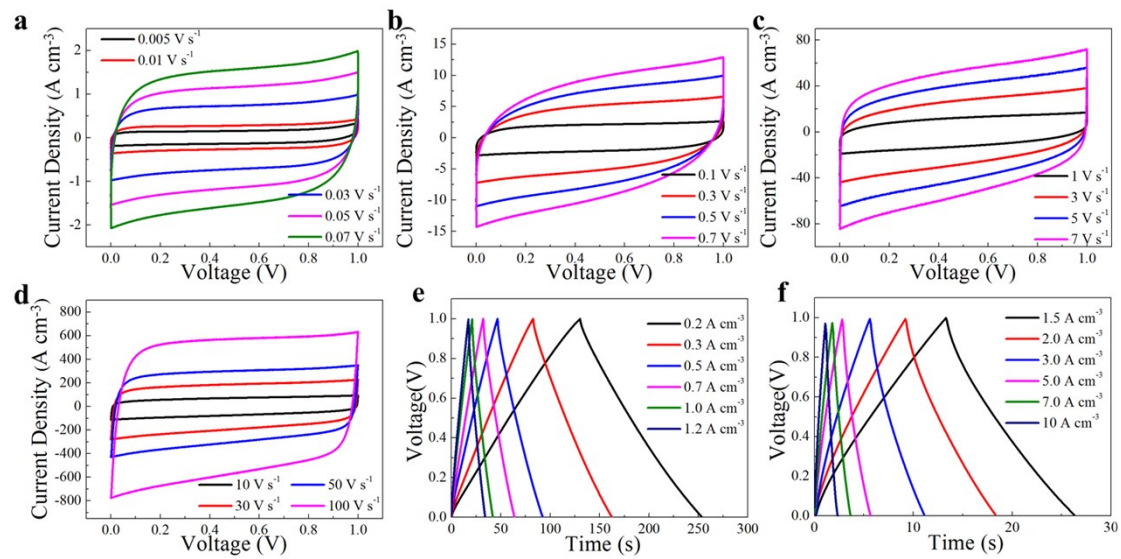

**Figure S9.** Electrochemical properties of CNTs ASSP device. (a-d) Cyclic voltammograms at various scan rates from 5 mV s<sup>-1</sup> to 100 V s<sup>-1</sup>. (e, f) Galvanostatic charging/discharging curves obtained at different current densities from 0.2 to 10 A cm<sup>-3</sup>.

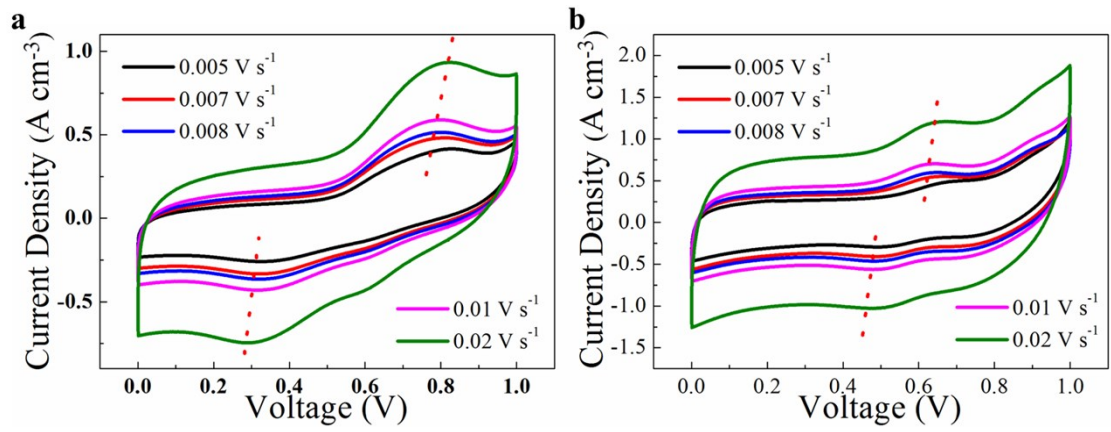

**Figure S10.** CV curves of (a) Bi and (b) Bi/CNTs ASSP device at scan rates from 5 to 20 mV s<sup>-1</sup> used for fitting the  $b$ -values.

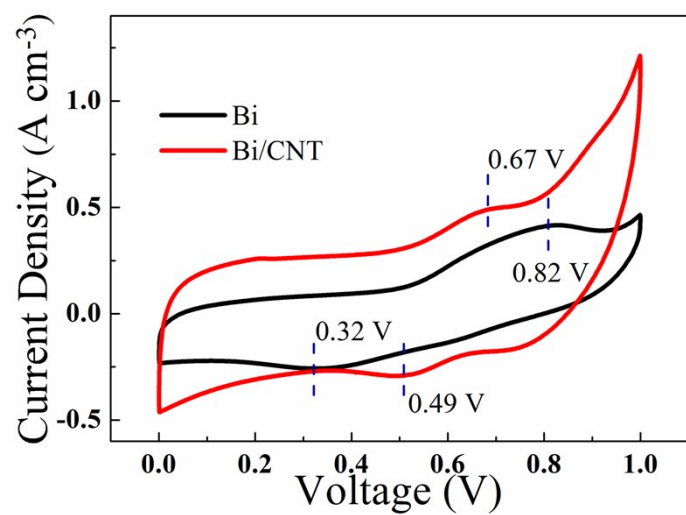

**Figure S11.** CV curves of Bi and Bi/CNTs ASSP device at scan rate of  $5 \text{ mV s}^{-1}$  in which the redox peaks are located at 0.82/0.32 V and 0.67/0.49 V.

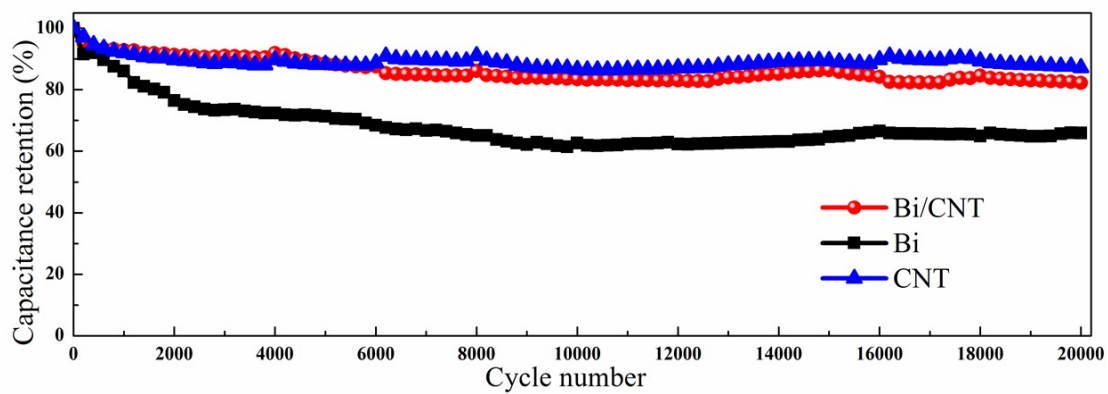

**Figure S12.** Capacitance retention of Bi/CNTs, Bi and CNTs ASSP device after electrochemical cycling tests of 20,000 cycles at  $0.5 \text{ V s}^{-1}$ .
